# Supplementary material for: Neuregulin3 alters cell fate in the epidermis and mammary gland
Source: PubMed Central journal article supplement (PMC2110892; doi:10.1186/1471-213x-7-105), 2007-09-19
Supplement: 1471-213X-7-105-S1.pdf [file 1471-213X-7-105-S1.pdf]

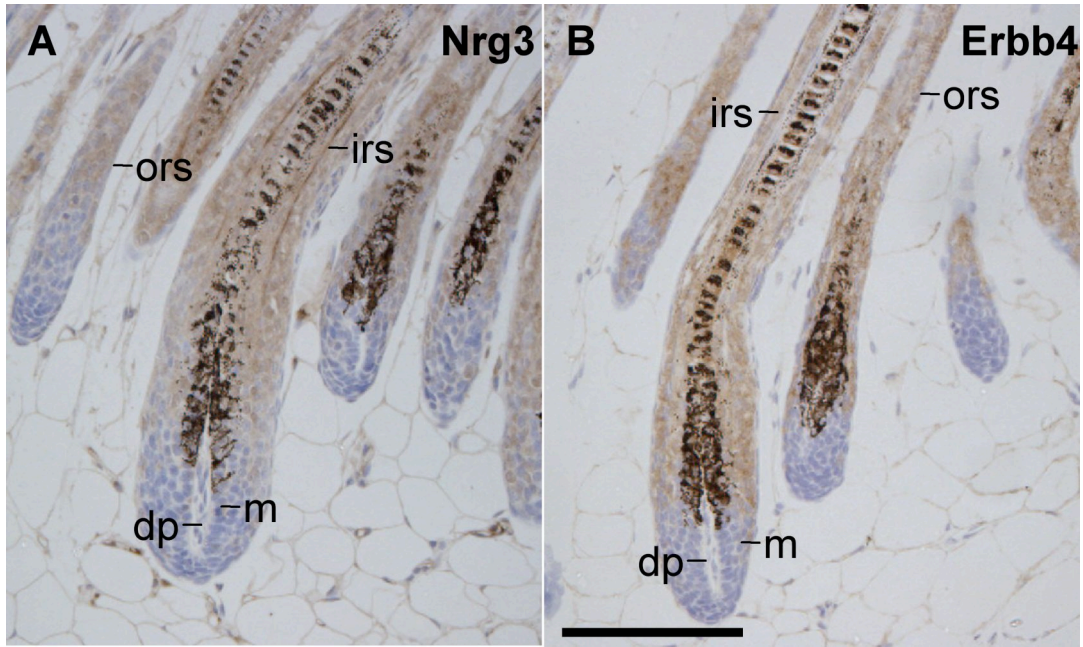

**Additional File 1. Immunohistochemical analysis shows the expression of Nrg3 and Erbb4 in hair follicles at P7.**

(A) Nrg3 is expressed at low to moderate levels in the hair follicles.

(B) Erbb4 is expressed at low levels in the hair follicles.

dp, dermal papilla; irs, inner root sheath; m, matrix; ors, outer root sheath.

The scale bar represents 50  $\mu$ m.
