# Supplementary material for: Neuregulin3 alters cell fate in the epidermis and mammary gland
Source: PubMed Central journal article supplement (PMC2110892; doi:10.1186/1471-213x-7-105), 2007-09-19
Supplement: 1471-213X-7-105-S2.pdf [file 1471-213X-7-105-S2.pdf]

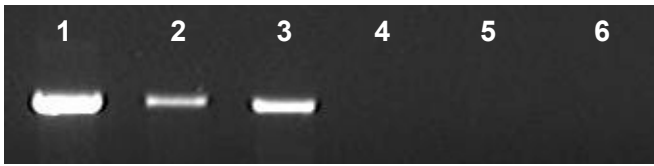

**Additional File 2. PCR analysis of K14-*Nrg3* transgenic mice.**

Genomic DNA extracted from tail biopsy from each founder were amplified using *Nrg3* specific primers and analyzed by electrophoresis on a 1% agarose gel. Results are shown for three K14-*Nrg3* founders (lanes 1–3), two non-transgenic littermates (lanes 4–5) and a negative control (lane 6). All founder mice displaying the mutant skin phenotype produced a 746 bp product. Littermates with no skin phenotype produced no product. Genomic DNA was also digested with EcoRV and subjected to Southern blot analysis, which produced a 5.3 kb fragment in all transgenic founders (data not shown).
