# Supplementary material for: Neuregulin3 alters cell fate in the epidermis and mammary gland
Source: PubMed Central journal article supplement (PMC2110892; doi:10.1186/1471-213x-7-105), 2007-09-19
Supplement: 1471-213X-7-105-S3.pdf [file 1471-213X-7-105-S3.pdf]

|                           | Males | Females |
|---------------------------|-------|---------|
| number of transgenic pups | 6     | 4       |
| total number of pups      | 86    | 63      |
| efficiency (%)            | 5.4   | 2.7     |

**Additional File 3. Efficiency of transgenesis of K14-*Nrg3* transgenic mice.**
