# Supplementary material for: Neuregulin3 alters cell fate in the epidermis and mammary gland
Source: PubMed Central journal article supplement (PMC2110892; doi:10.1186/1471-213x-7-105), 2007-09-19
Supplement: 1471-213X-7-105-S5.pdf [file 1471-213X-7-105-S5.pdf]

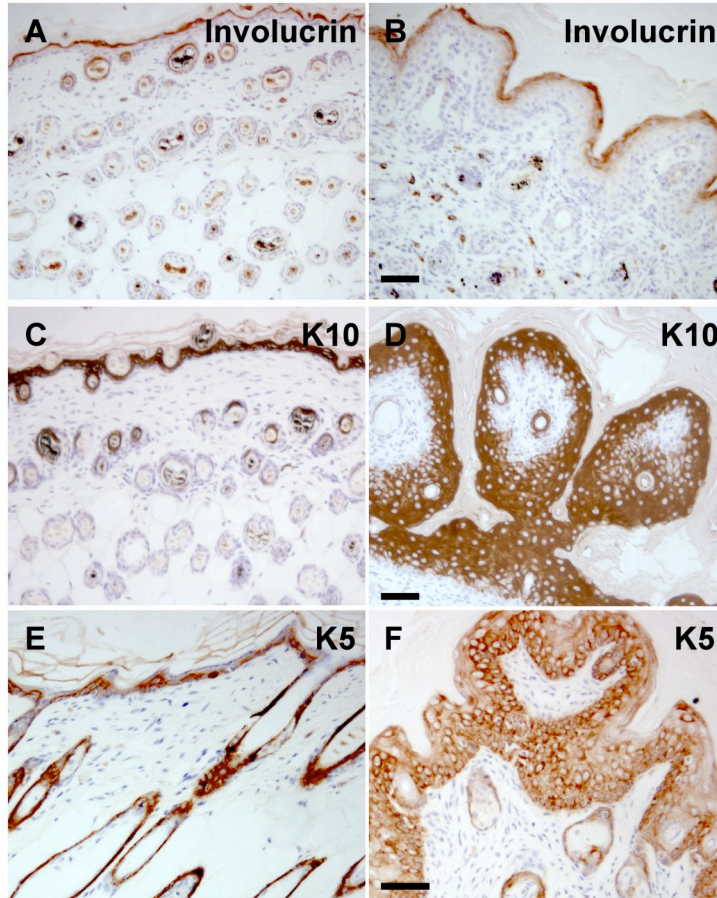

**Additional File 5. Immunohistochemistry using epidermal differentiation markers.**

Immunohistochemistry of sections of dorsal skin from transgenic mice and non-transgenic littermates at P7 with antibodies to the proteins indicated.

(A and B) Expression of Involucrin, a terminal differentiation marker, is also expressed in the granular and cornified layers of non-transgenic (A) and K14-*Nrg3* transgenic (B) skin.

(C and D) Expression of K10, a marker for committed early differentiating cells, is expressed in the suprabasal layer of non-transgenic (C) and K14-*Nrg3* transgenic (D) skin.

(E and F) Expression of K5, a marker for basal proliferating keratinocytes, is expressed in the basal layer of non-transgenic skin and the ORS of the hair follicles (E) and expressed at high levels throughout the basal and suprabasal layers of K14-*Nrg3* transgenic skin and ORS of the hair follicles (F). The scale bar represents 50  $\mu\text{m}$ .
